# Supplementary material
Source: PubMed Central journal article supplement (PMC6859953)

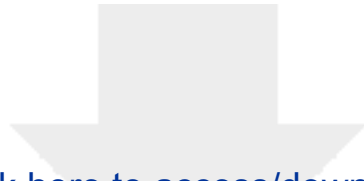

Click here to access/download  
**Supplemental Material**  
Author acknowledgements.docx

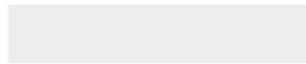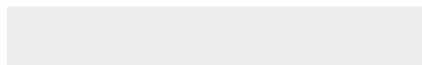

Supplement: NIHMS1050894-supplement-1.pdf [file NIHMS1050894-supplement-1.pdf]
